# Supplementary material for: A Spatial and Functional Interaction of a Heterotetramer Survivin–DNA-PKcs Complex in DNA Damage Response
Source: Oxford University Press journal article supplement (doi:10.1158/0008-5472.can-20-2931), 2021-01-06
Supplement: 00085472can202931-sup-250182_2_supp_6777485_ql4zg4.xlsx [file 00085472can202931-sup-250182_2_supp_6777485_ql4zg4.xlsx]

## Sheet: Pathway analysis - Figure 5F
DNA-damage/repair	Chromosome organization	Cell Cycle	(Post)-Transcriptional regulation	Apoptosis	Adhesion	Ion transport	Other
DAXX, POLA2, SLC35F2, FLNA, TCOF1, AEN, LMNA, ZFP36L2, TAF15, RBMX, FOXO3, ACIN1, CHD2, RBBP6, E2F1, TRIP13, THRAP3, FOXM1, NUP98, PCBP2, KDM3A, SRRM2, ZBTB1	TAF15, CAD, ACIN1, NAV2, NSD1, PIBF1, CHD2, NUP98, POLA2, ZBTB1, TRIP13, DAXX, KDM3A	E2F1, LMNA, PIBF1, NUP98, POLA2, TRIP13, FLNA, FOXM1, PCM1, LARP1, DOCK6	LUC7L2, PAPOLA, GTF3C1, RNPS1, MED13L, ZNF326, RBM15, CIC, ATF7IP, CPSF7	E2F1, SELENOK, FOXO3, AEN, CASP8AP2, DAXX	TJP1, ZYX	SLC19A1, SLC9A3	ABHD15, QSOX2, CRKL, GPHN, MYRF, LAD1, AP3D1, TRAFD1, BCLAF3

## Sheet: Phosphoproteomics abundances
Figure 5D
	Exp1 - DNA-PK Inh. vs. Ctrl	Exp2 - DNA-PK Inh. vs. Ctrl	Exp1 - siSurv vs. Ctrl	Exp2 - siSurv vs. Ctrl	Exp1 - Surv-GFP vs. GFP	Exp2 - Surv-GFP vs. GFP
TJP1-S151	-0.468513	-0.701901	-1.80966	-1.02753	1.82001	1.43219
ABHD15-S434	-1.48477	-1.33613	-0.597577	-0.498512	0.72204	0.707278
* POLA2-[136-160]	-0.885268	-0.852959	-0.336525	-0.5974	0.639824	0.349514
* SLC35F2-[362-374]	-0.227995	-1.60733	-0.178337	-5.34054	0.374848	3.33039
LARP1-T809	-0.615261	-0.603883	-0.0909945	-0.990632	-0.698126	2.21691
QSOX2-S25	-0.478512	-0.902402	-0.126713	-0.819509	-0.697483	2.05338
Figure 5D-cont.
	Exp1 - DNA-PK Inh. vs. Ctrl	Exp2 - DNA-PK Inh. vs. Ctrl	Exp1 - siSurv vs. Ctrl	Exp2 - siSurv vs. Ctrl	Exp1 - Surv-GFP vs. GFP	Exp2 - Surv-GFP vs. GFP
LUC7L2-S370	-0.34644	-0.455255	-1.88873	-1.47683	1.9177	2.04439
DOCK6-T2029	0.0757675	-0.586736	0.258312	-0.907334	0.410376	2.05825
SELENOK-S51	-0.77444	-0.0140069	-1.24978	-1.6274	1.73697	0.680721
* FLNA-T2336	-0.395078	-0.521206	-1.42899	-1.3959	0.880924	1.15872
ZYX-S169	-0.23009	-0.433942	-1.35908	-1.26045	1.18672	1.41295
PAPOLA-S509	-0.0759488	-0.988027	-1.18211	-0.992007	1.12705	1.14429
* TCOF1-S1407	-0.0767426	-0.896402	-0.711829	-0.689345	1.4178	1.01902
CASP8AP2-S1537	-0.188709	-0.495305	-0.421	-0.620183	0.843731	1.05831
DAXX-S518	0.0403321	-0.567041	-0.779734	-1.00556	1.23534	0.568284
CRKL-[181-189]	-0.789569	-0.243683	-0.35238	-0.451434	0.294061	1.16875
GPHN-S280	-0.241634	-0.483233	-0.95262	-0.963145	0.525815	0.709574
* AEN-[45-81]	-0.656926	0.0149503	-0.361188	-0.281182	1.03607	0.566033
MYRF-S736	-0.199179	-0.399931	-0.488238	-0.0306968	0.960711	0.598693
* LMNA-S403	-0.0545765	-0.879603	-0.489449	-0.879603	0.179203	0.845966
* ZFP36L2-S125	-0.359972	-0.485051	-0.00227734	-0.670193	0.642995	0.847997
* TAF15-S433	-0.0691704	-0.454815	-0.779485	-0.85305	0.525995	0.790991
* RBMX-S221	-0.386257	-0.473784	-0.419196	-0.139365	0.687143	0.596039
* FOXO3-S253	-0.597287	-0.879402	-0.463414	-0.283609	0.0996129	0.378512
CAD-S1406	-0.257539	-0.401984	-0.639167	-0.242469	0.22023	0.301721
* ACIN1-S561	-0.186576	-0.408994	-0.298469	-0.667211	0.204952	1.31259
PIBF1-T569	-0.449611	-0.300233	-0.596837	-0.127917	0.891066	0.501194
NSD1-S938	-0.839247	-0.207276	-0.297452	-0.842644	0.137504	0.966833
GTF3C1-T514	-0.0156109	-1.06826	-0.350513	-0.186973	0.554614	0.845459
LAD1-S147	-0.472036	-0.155361	-0.638658	-0.47322	0.401251	0.0910607
* ZFP36L2-S426	-0.618796	-0.454032	-0.183122	-0.573467	0.0663874	0.866875
NAV2-S1019	-0.231406	-0.424091	-0.560994	-0.114672	0.537058	0.421169
AP3D1-S829	0.129654	-0.860696	-0.15161	-0.388548	0.53059	0.559934
* CHD2-S1807	-1.46804	-0.284977	0.0247679	-2.39769	1.05866	-0.0182853
TRAFD1-S470	-0.111088	-0.467554	-0.577852	-1.08301	-0.0181889	0.833941
* RBBP6-T1087	-0.690191	-0.297073	-0.434551	-0.355613	0.909912	-0.136156
RNPS1-S27	-0.590001	-0.246371	-1.03133	-0.940979	0.363928	0.268192
* E2F1-S375	0.0415791	-0.631032	-0.309328	-0.736966	0.376563	0.420332
* TRIP13-S18	-0.47906	-0.324298	-0.360546	-0.247336	0.454795	0.41792
MED13L-S777	-0.190398	-0.374745	-0.595493	-0.314873	-0.00494922	0.669027
BCLAF3-S139	-0.428058	-0.170635	-0.426285	-0.534728	0.311857	0.457716
ZNF326-Y57	-0.398549	-0.264595	-0.465664	-0.497958	0.24664	0.932886
* THRAP3-[622-639]	-0.321928	-0.280108	-0.574236	-0.161463	-0.0046917	0.467844
SLC19A1-S474	-0.654249	-0.00209847	-0.841212	-0.788432	0.923006	-0.0153208
SLC9A3-T564	-0.611435	0.138076	-0.663902	0.188702	0.541373	0.123735
* FOXM1-S4	-0.813696	-0.544673	-0.239366	-0.961081	0.323096	0.334664
RBM15-S724	-0.466145	-0.930381	-0.491506	-0.111678	0.811928	0.112348
* NUP98-S839	-0.255799	-0.329991	-1.17769	-0.814032	0.682039	0.19159
* PCBP2-S272	-0.989295	-1.04176	-0.724323	-0.401054	0.0602675	0.691516
CIC-S277	-0.387746	-0.36753	-0.503479	-0.529865	0.487933	0.0754485
* KDM3A-S463	-0.236935	-0.37228	-0.528998	-0.117949	0.39701	0.185441
ATF7IP-S673	-0.473016	-0.412347	-0.455229	-0.46378	0.526229	0.271367
PCM1-S804	-0.324435	-0.363812	-0.480479	-0.770759	0.0291464	0.50073
CPSF7-S60	-0.306712	-0.328041	-0.743994	-0.267295	0.443607	0.293705
* SRRM2-S231	0.366912	-1.21384	-0.461811	-0.390769	0.372078	0.427797
* ZBTB1-[303-316]	-0.290256	-0.256148	-1	-0.522484	0.11477	0.396659

## Sheet: Phosphoproteomics descriptions
Protein Name	Description
ABHD15	Abhydrolase Domain Containing 15
ACIN1	Apoptotic Chromatin Condensation Inducer 1
AEN	Apoptosis Enhancing Nuclease
AP3D1	Adaptor Related Protein Complex 3 Subunit Delta 1
ATF7IP	Activating Transcription Factor 7 Interacting Protein
BCLAF3	BCLAF1 And THRAP3 Family Member 3
CAD	Carbamoyl-Phosphate Synthetase 2, Aspartate Transcarbamylase, And Dihydroorotase
CASP8AP2	Caspase 8 Associated Protein 2
CHD2	Chromodomain Helicase DNA Binding Protein 2
CIC	Capicua Transcriptional Repressor
CPSF7	Cleavage And Polyadenylation Specific Factor 7
CRKL	CRK Like Proto-Oncogene, Adaptor Protein
DAXX	Death Domain Associated Protein
DOCK6	Dedicator Of Cytokinesis 6
E2F1	E2F Transcription Factor 1
FLNA	Filamin A
FOXM1	Forkhead Box M1
FOXO3	Forkhead Box O3
GPHN	Gephyrin
GTF3C1	General Transcription Factor IIIC Subunit 1
KDM3A	Lysine Demethylase 3A
LAD1	Ladinin 1
LARP1	La Ribonucleoprotein 1, Translational Regulator
LMNA	Lamin A/C
LUC7L2	LUC7 Like 2, Pre-MRNA Splicing Factor
MED13L	Mediator Complex Subunit 13L
MYRF	Myelin Regulatory Factor
NAV2	Neuron Navigator 2
NSD1	Nuclear Receptor Binding SET Domain Protein 1
NUP98	Nucleoporin 98 And 96 Precursor
PAPOLA	Poly(A) Polymerase Alpha
PCBP2	Poly(RC) Binding Protein 2
PCM1	Pericentriolar Material 1
PIBF1	Progesterone Immunomodulatory Binding Factor 1
POLA2	DNA Polymerase Alpha 2, Accessory Subunit
QSOX2	Quiescin Sulfhydryl Oxidase 2
RBBP6	RB Binding Protein 6, Ubiquitin Ligase
RBM15	RNA Binding Motif Protein 15
RBMX	RNA Binding Motif Protein X-Linked
RNPS1	RNA Binding Protein With Serine Rich Domain 1
SELENOK	Selenoprotein K
SLC19A1	Solute Carrier Family 19 Member 1
SLC35F2	Solute Carrier Family 35 Member F2
SLC9A3	Solute Carrier Family 9 Member A3
SRRM2	Serine/Arginine Repetitive Matrix 2
TAF15	TATA-Box Binding Protein Associated Factor 15
TCOF1	Treacle Ribosome Biogenesis Factor 1
THRAP3	Thyroid Hormone Receptor Associated Protein 3
TJP1	Tight Junction Protein 1
TRAFD1	TRAF-Type Zinc Finger Domain Containing 1
TRIP13	Thyroid Hormone Receptor Interactor 13
ZBTB1	Zinc Finger And BTB Domain Containing 1
ZFP36L2	ZFP36 Ring Finger Protein Like 2
ZNF326	Zinc Finger Protein 326
ZYX	Zyxin

## Sheet: Proteomics abundances
Figure 6C
	Exp1 - DNA-PK Inh. vs. Ctrl	Exp2 - DNA-PK Inh. vs. Ctrl	Exp1 - siSurv vs. Ctrl	Exp2 - siSurv vs. Ctrl	Exp1 - Surv-GFP vs. GFP	Exp2 - Surv-GFP vs. GFP
* CDCA2	-0.550592	-0.299481	-0.771635	-0.434709	0.255856	0.387986
NEO1	-0.561194	-0.0375397	-0.32073	-0.60111	0.249307	0.374298
* PTTG1	-0.233314	-0.468553	-0.68987	-0.519778	0.495957	0.718587
* SENP5	-0.463947	-0.225713	-0.535332	-0.0506261	-0.0229004	0.559427
STMN3	-0.244804	-0.584963	-0.457348	-0.886231	0.797244	0.952797
* STRA13	-0.0708503	-0.758661	-0.0756997	-0.463205	0.256637	0.300954
TMEM167B	-0.768674	0.0591131	-0.708865	-0.114106	0.295709	0.260764
* TOP2A	-0.0616452	-0.520179	-0.354127	-0.32797	0.682966	0.804831
Figure 6D
	Exp1 - DNA-PK Inh. vs. Ctrl	Exp2 - DNA-PK Inh. vs. Ctrl	Exp1 - siSurv vs. Ctrl	Exp2 - siSurv vs. Ctrl	Exp1 - Surv-GFP vs. GFP	Exp2 - Surv-GFP vs. GFP
ENOX2	1.02554	-0.171271	0.787592	-0.123575	-0.378512	-0.405256
FAM63A	0.351935	0.18717	0.395342	0.367419	-0.620284	-0.449875
FHL3	0.181494	0.360672	0.162939	0.564905	-0.37752	-0.182035
* HIRIP3	0.187203	0.456378	0.658384	0.166192	-0.611804	-0.343954
* HMGA1	0.0103282	1.48712	-0.085784	1.34503	-0.0840865	-0.419498
* HMGA2	0.18189	1.69941	0.38217	1.80544	-0.672923	-0.814986
* HMGN1	0.0784271	1.47775	0.0626425	1.42466	-0.473966	-0.528319
* HMGN2	0.525886	1.85676	0.0611979	1.84003	-0.679697	-0.0497164
* HMGN5	-0.0651406	1.10399	-0.23778	1.09255	-1.36667	-2.01212
MT2A	0.266228	0.342436	0.177768	0.708841	-0.351326	-0.247979
* RBBP8	1.19909	0.695924	1.27777	0.86533	-0.254337	-0.293249
RNF13	0.475752	0.193544	0.373962	0.239347	-0.246096	-0.293253
SLC52A3	0.441552	0.128238	0.575625	0.354873	-0.0384741	-0.531647
Figure 6E
	Exp1 - siSurv vs. siCtrl	Exp2 - siSurv vs. siCtrl	Exp1 - Surv-EGFP vs. EGFP	Exp2 - Surv-EGFP vs. EGFP
BIRC5	-2.63392	-3.03339	3.41594	3.33402
INCENP	-1.96787	-2.41954	1.99521	1.59287
CDCA8	-2.11678	-2.06251	2.0397	1.24655
AURKB	-1.04523	-1.31816	1.03454	1.00777
Figure 6F
	Exp1 - siSurv vs. siCtrl	Exp2 - siSurv vs. siCtrl	Exp1 - Surv-EGFP vs. EGFP	Exp2 - Surv-EGFP vs. EGFP
NMI	0.620337	1.16993	-1.26984	-0.882348
SDSL	0.546224	0.464384	-1.10164	-1.10391
SLFN5	1.14521	1.16629	-0.550697	-0.57973
ZNF806	0.978396	1.05969	-0.508549	-0.508087

## Sheet: Proteomics descriptions
Protein Name	Description
AURKB	Aurora Kinase B
BIRC5	Baculoviral IAP Repeat Containing 5
CDCA2	Cell Division Cycle Associated 2
CDCA8	Cell Division Cycle Associated 8
ENOX2	Ecto-NOX Disulfide-Thiol Exchanger 2
FAM63A	MINDY Lysine 48 Deubiquitinase 1
FHL3	Four And A Half LIM Domains 3
HIRIP3	HIRA Interacting Protein 3
HMGA1	High Mobility Group AT-Hook 1
HMGA2	High Mobility Group AT-Hook 2
HMGN1	High Mobility Group Nucleosome Binding Domain 1
HMGN2	High Mobility Group Nucleosome Binding Domain 2
HMGN5	High Mobility Group Nucleosome Binding Domain 5
INCENP	Inner Centromere Protein
MT2A	Metallothionein 2A
NEO1	Neogenin 1
NMI	N-Myc And STAT Interactor
PTTG1	PTTG1 Regulator Of Sister Chromatid Separation, Securin
RBBP8	RB Binding Protein 8, Endonuclease
RNF13	Ring Finger Protein 13
SDSL	Serine Dehydratase Like
SENP5	SUMO Specific Peptidase 5
SLC52A3	Solute Carrier Family 52 Member 3
SLFN5	Schlafen Family Member 5
STMN3	Stathmin 3
STRA13	Basic Helix-Loop-Helix Family Member E40
TMEM167B	Transmembrane Protein 167B
TOP2A	DNA Topoisomerase II Alpha
ZNF806	Zinc Finger Protein 806
